# Supplementary material for: Optimal scaling of protein-water interactions coupled with targeted torsional refinements yields balanced force fields suitable for simulations of single-chain folded proteins, disordered polypeptides, and protein-protein complexes
Source: Research Square preprint supplement (doi:10.21203/rs.3.rs-5932820/v1), 2025-02-27
Supplement: Supplementary file 1 [file 821908db7e5a8166cfdfdbb5.docx]

**Supplementary information**

**Supplementary tables**

**Table S1.** Sequences of IDPs in simulations.

| Protein | N | Sequence | Box length (nm) |
| --- | --- | --- | --- |
| CspM34 | 34 | CEGFKTLKEGQVVEFEIQEGKKGGQAAHVKVVEC | 5.0 |
| (AAQAA)3 | 15 | Ace-AAQAAAAQAAAAQAA-NH2 | 5.0 |
| Histatin5 | 24 | DSHAKRHHGYKRKFHEKHHSHRGY | 5.0 |
| RS-peptide | 24 | GAMGPSYGRSRSRSRSRSRSRSRS | 5.0 |
| S(124-146) | 21 | SEEEEKKEESAGEEQVAKKKD | 5.0 |
| TDP43310-350 | 41 | GMNFGAFSINPAMMAAAQAALQSSWGMMGMLASQQNQSGPS | 6.5 |
| FUS0-43* | 44 | GMASNDYTQQATQSYGAYPTQPGQGYSQQSSQPYGQQSYSGYSQ | 6.5 |
| FUS120-126 | 44 | SSYGQPQSGSYSQQPSYGGQQQSYGQQQSYNPPQGYGQQNQYNS | 6.5 |
| RNAPII1927-1970 | 44 | SPTYSPTSPKGSTYSPTSPGYSPTSPTYSLTSPAISPDDSDEEN | 6.5 |
| H16 | 38 | MATLEKLMKAFESLKSFQQQQQQQQQQQQQQQQPPPPP | 6.5 |

*****a glycine residue was included in FUS0−43 as residue 0.

**Table S2.** Helix fraction RMSD between the simulation and the experiment of H16.

| Force field | RMSD (%) |
| --- | --- |
| ff99SBws​ | 8.9​ |
| ff99SB-disp​ | 10.4​ |
| ff99SBws-STQ kψ(S/T/Q) = 1.0​ | 12.7​ |
| ff99SBws-ST - kψ(Q) = 2.00​ | 6.2​ |
| ff99SBws-ST - kψ(Q) = 1.75​ | 8.8​ |
| ff99SBws-ST - kψ(Q) = 1.50​ | 5.1​ |
| ff99SBws-ST - kψ(Q) = 1.25​ | 9.0​ |

In the ff99SBws-ST, kψ(S/T) = 1.0 kJ/mol.

**Supplementary Movies**

**Movie S1**. Representative all-atom (AA) simulations of Ubiquitin and Villin HP35 using ff03ws force field.

**Movie S2**. Representative AA simulations of Ubiquitin and Villin HP35 using ff99SBws force field.

**Movie S3**. Representative AA simulations of Ubiquitin under different scaling condition derived from ff03ws force field.

**Movie S4**. Representative AA simulations of Villin HP35 using ff03ws and the sidechain scaling of uncharged residues.

**Movie S5**. Representative AA simulation of protein complex, Barnase/Barstar, using ff03w-sc and ff99SBws-STQ′ force fields.

**Movie S6**. Representative AA simulation of protein complex, SGPB/OMTKY3, using ff03w-sc and ff99SBws-STQ′ force fields.

**Supplementary figures**


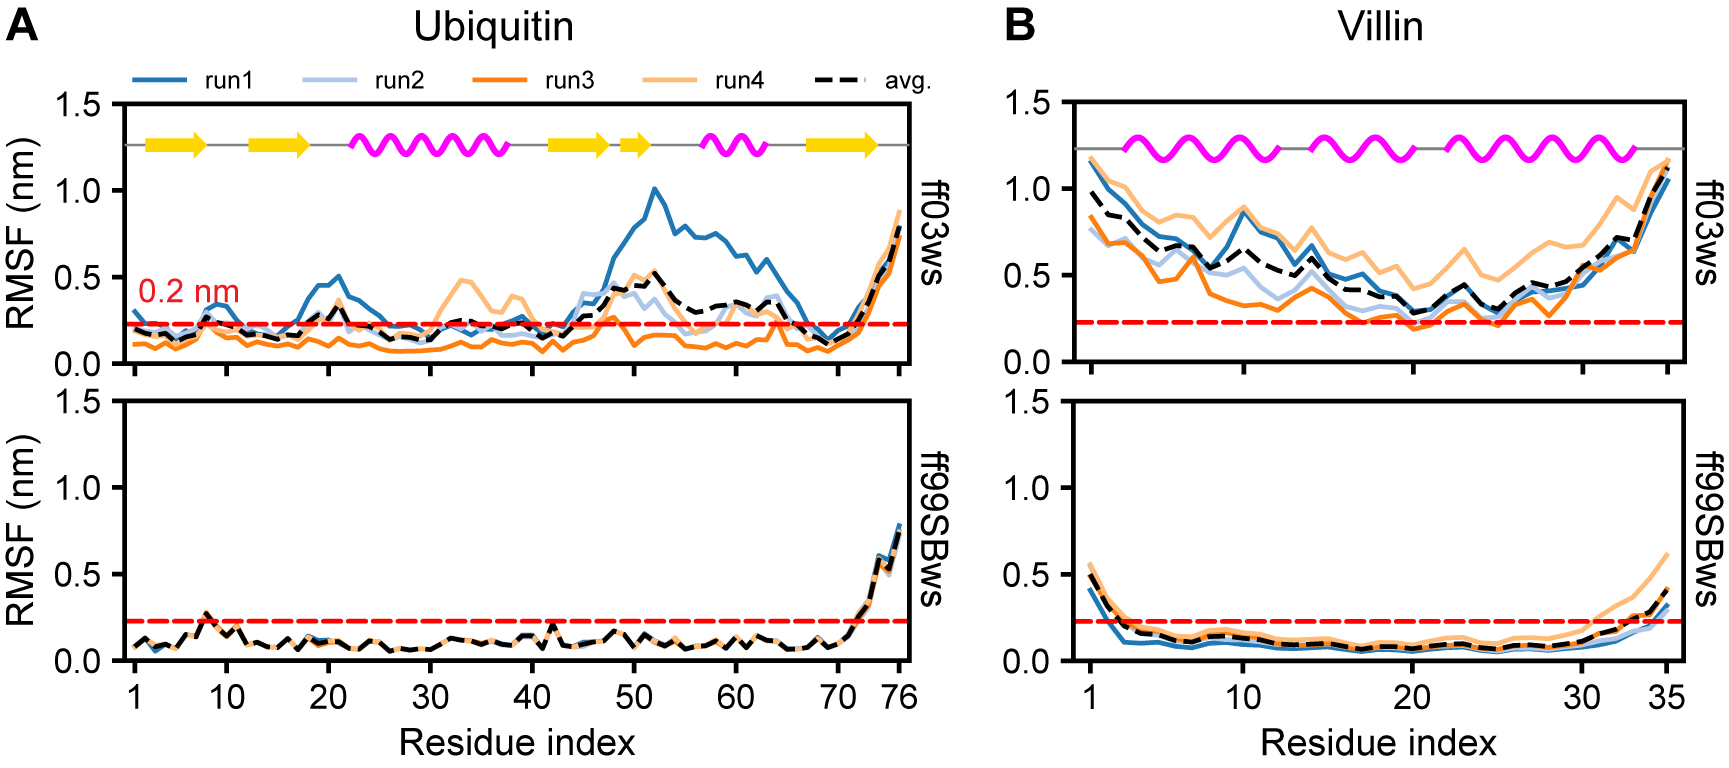


**Figure S1**: Root-mean-square fluctuation (RMSF) as a function of residue index for (**A**) Ubiquitin and (**B**) Villin simulated with Amber ff03ws and ff99SBws force fields. The black dashed line represents the average RMSF across all independent simulations.


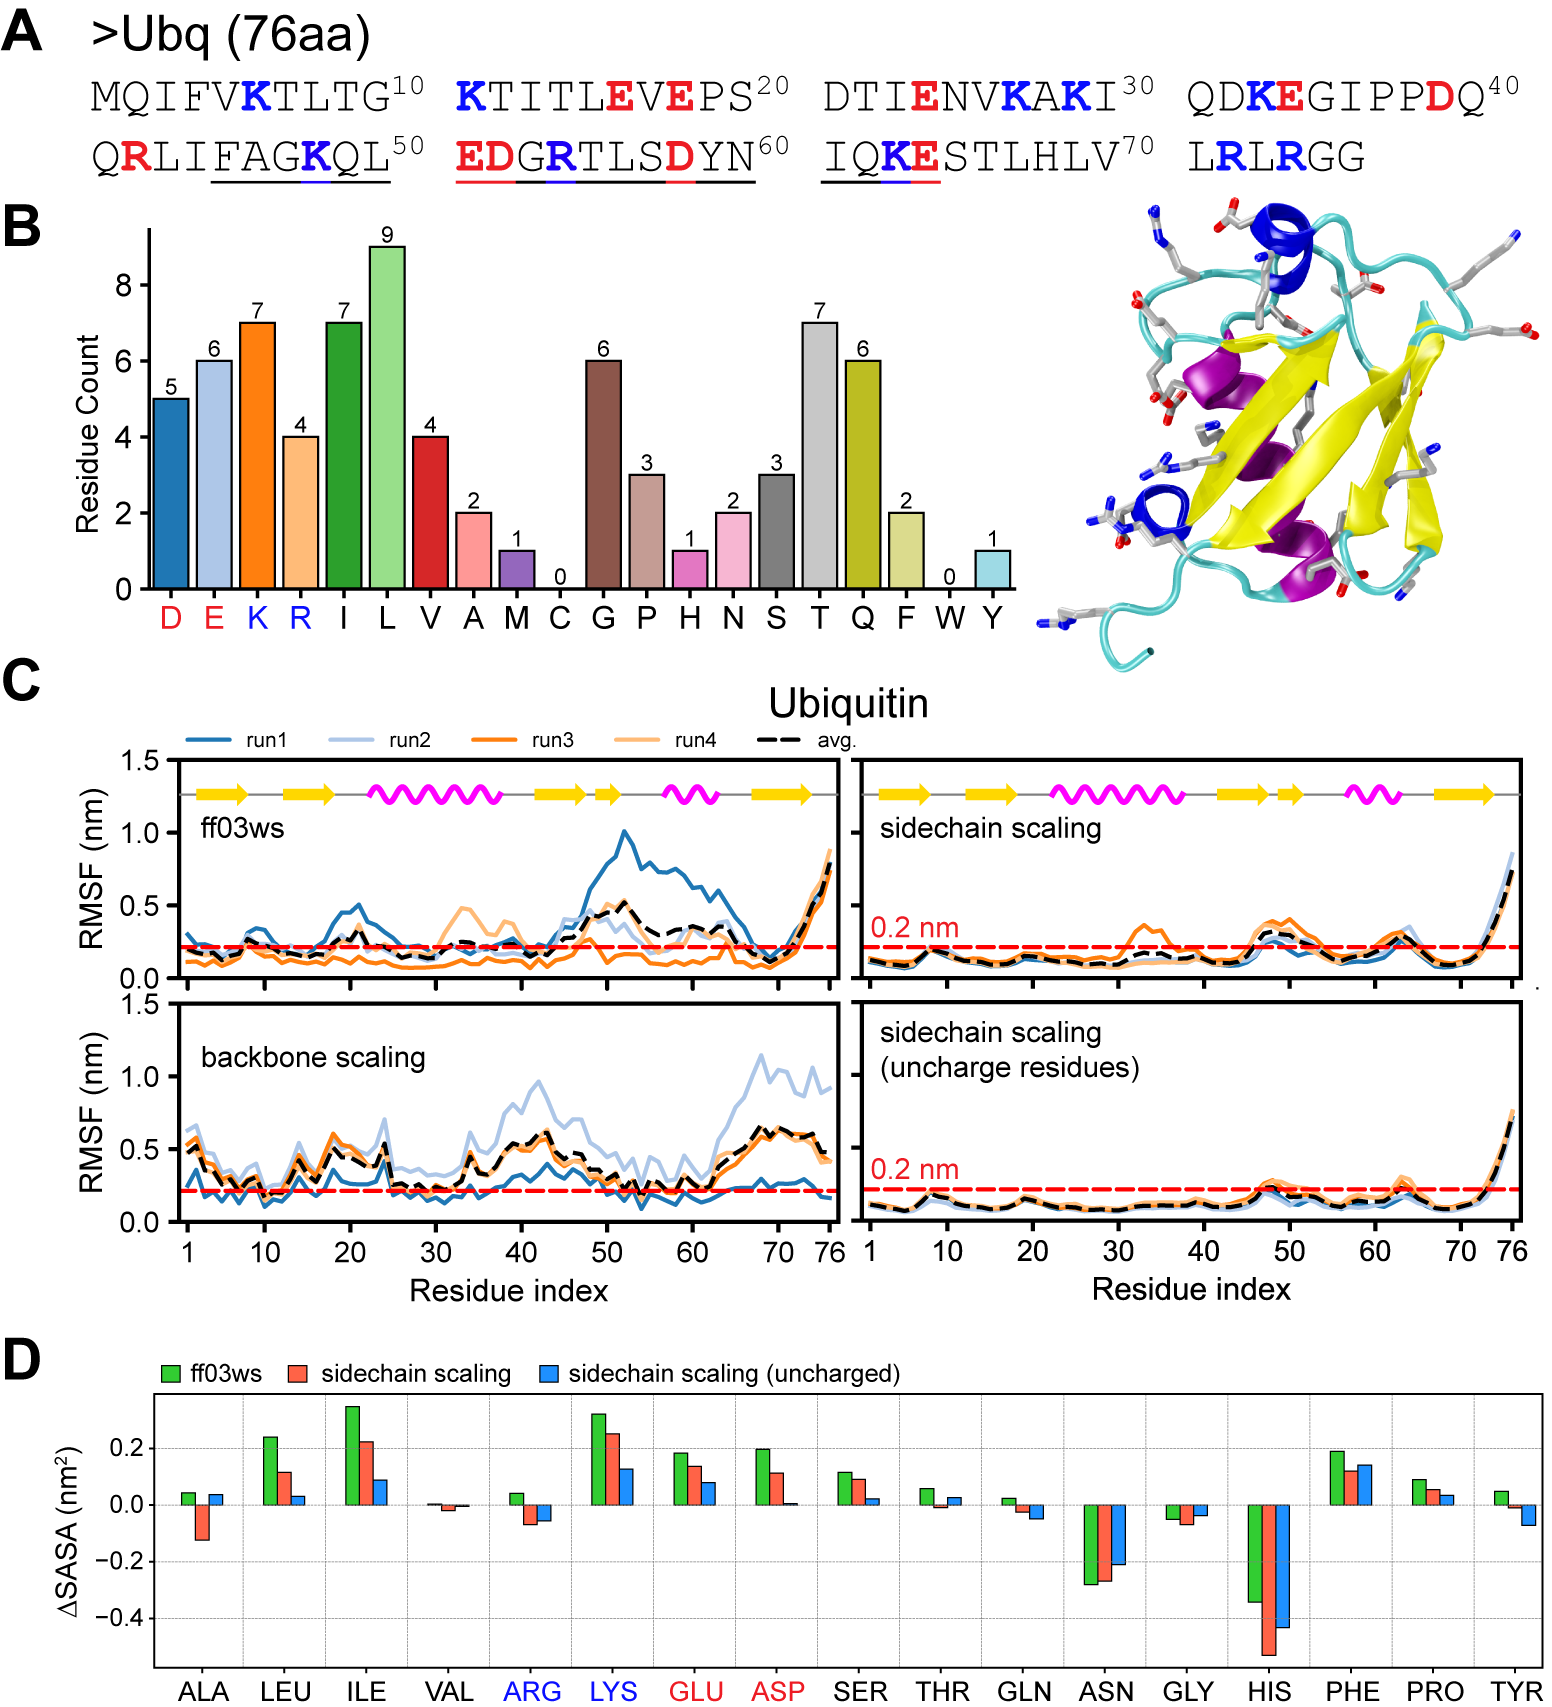


**Figure S2**. **A.** Amino acid sequence of ubiquitin (76 residues). The loop (aa:45-65) is underlined in the sequence. **B.** Bar plot showing the amino acid composition of ubiquitin. The x-axis represents amino acids using their one-letter codes, and the y-axis represents the residue count for each amino acid type. The snapshot shows a 3D structure of ubiquitin (PDB 1D3Z), with secondary structures highlighted: α-helices in purple, 3-10 helix in blue, β-sheets in yellow, and unstructured regions in cyan. The charged residues are shown in the licorice presentation. **(c)** RMSF of ubiquitin residues as a function of residue index for four independent simulation runs using the amber ff03ws, backbone scaling, sidechain scaling, and sidechain scaling (uncharged residues). The black dashed line represents the average RMSF across all runs. **(d)** Difference in solvent-accessible surface area (SASA) of ubiquitin relative to the X-ray structure conducted with ff03ws, sidechain scaling, and sidechain scaling of uncharged residues.


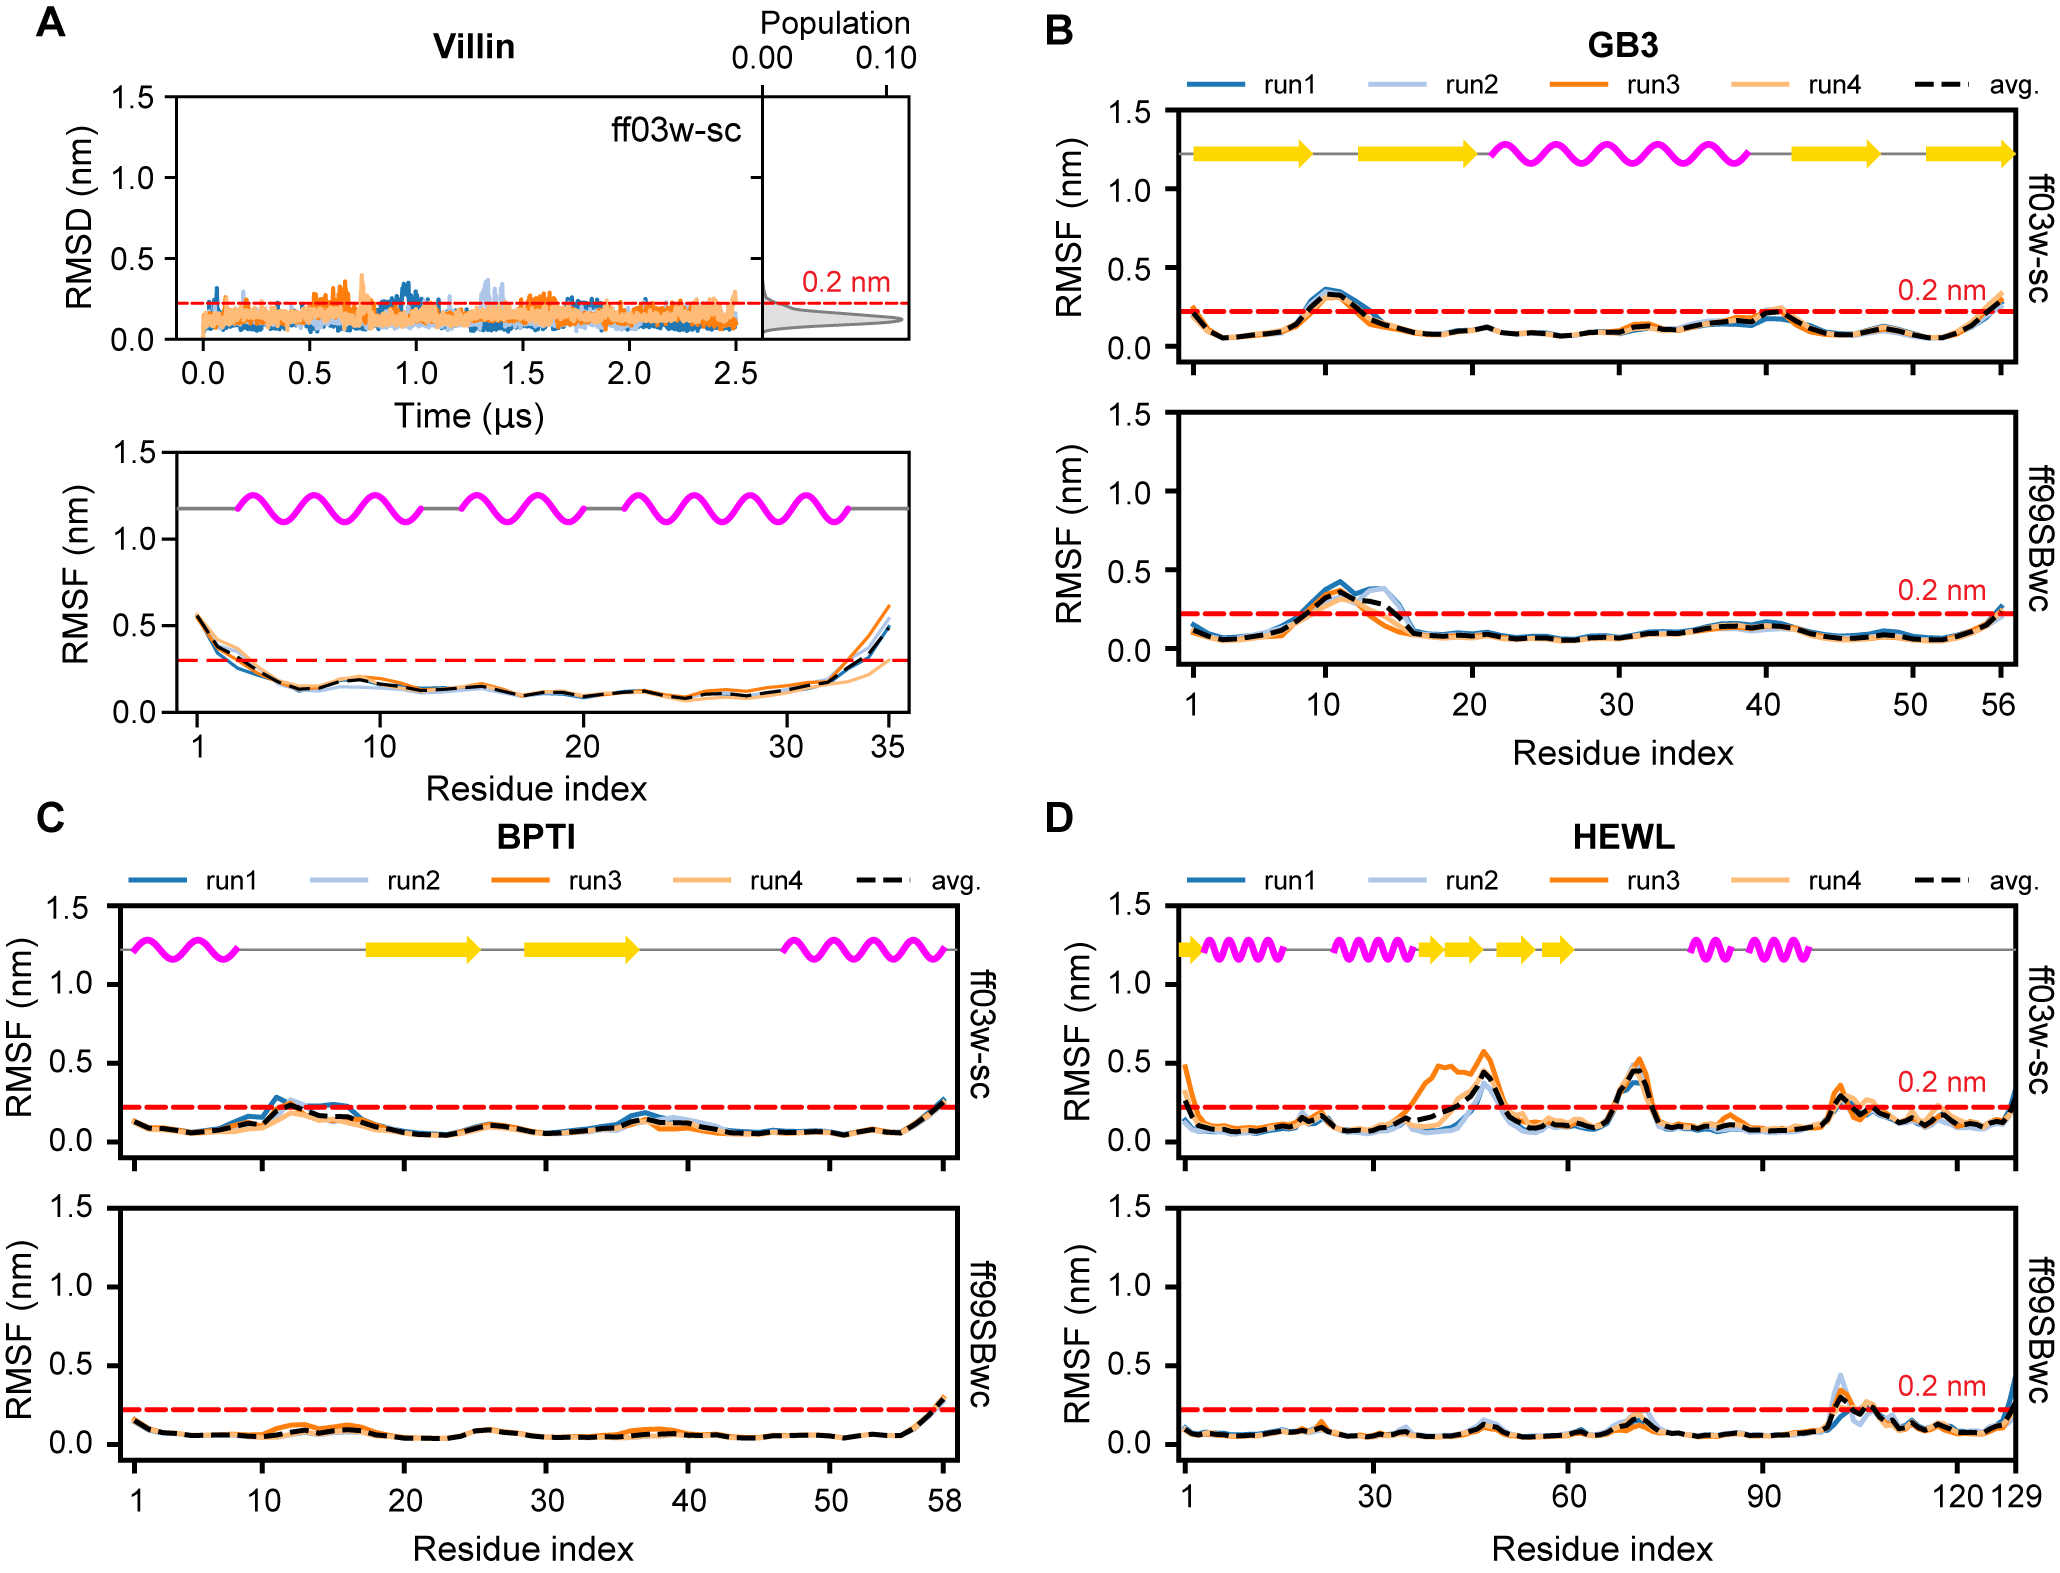


**Figure S3**. **A**. Backbone RMSD/F of the Nle-double mutant of Villin HP35 simulated using ff03w-sc. **B-D**. Comparison of RMSF of GB3, BPTI, and HEWL, using AMBER ff03w-sc and ff99SBws force fields.


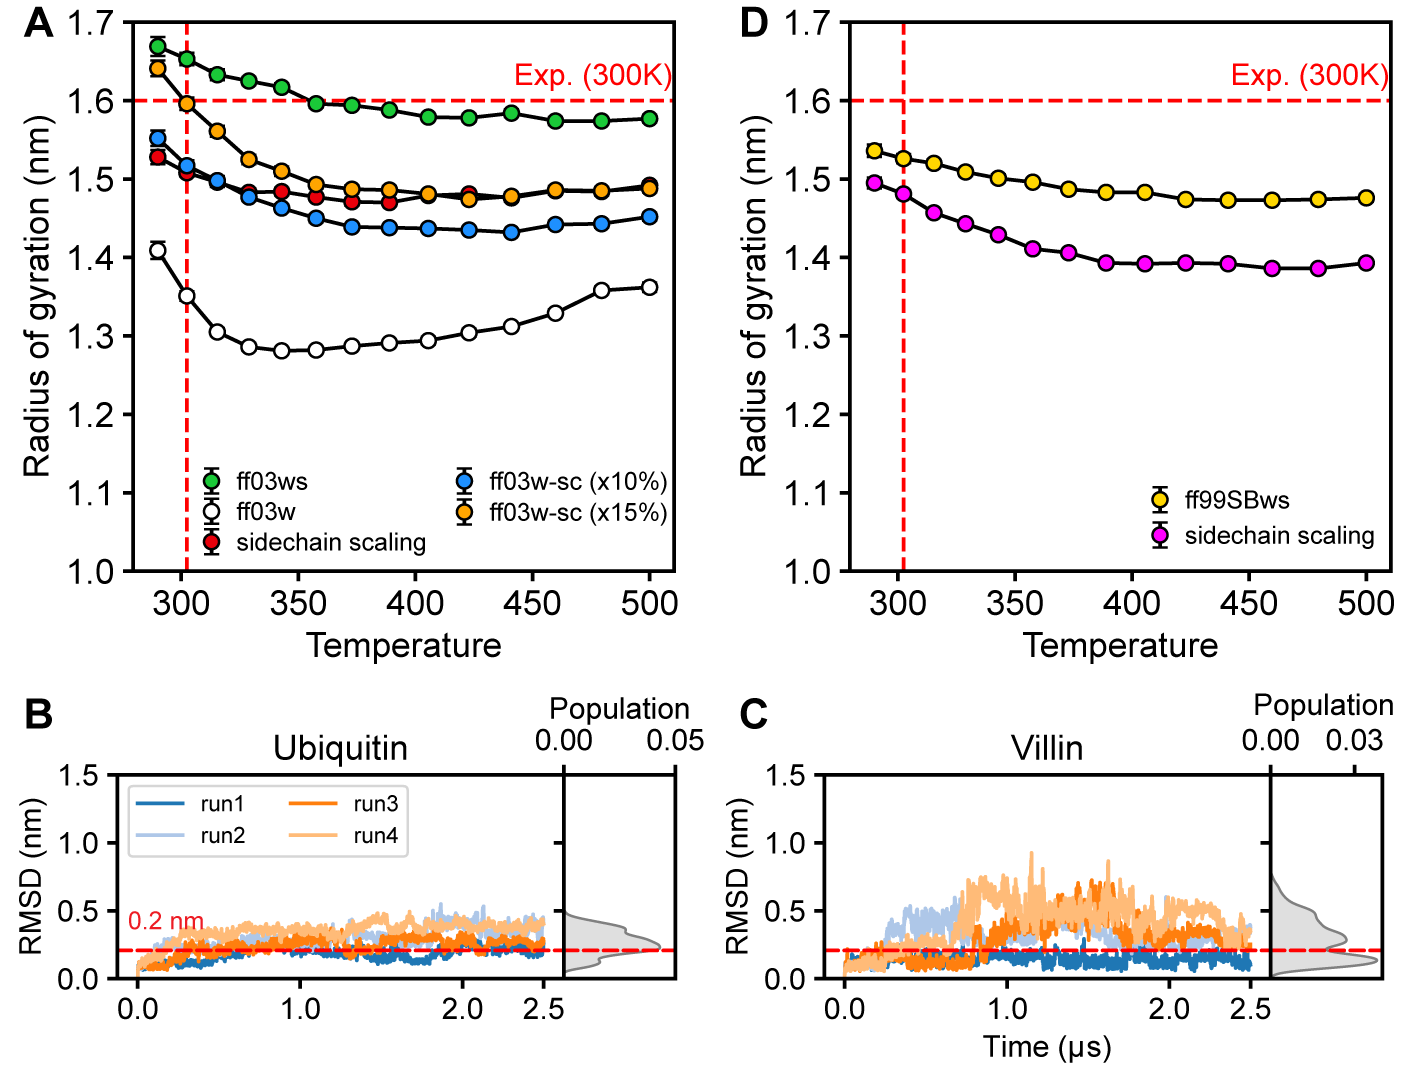


**Figure S4**. **A.** Radius of gyration of CspM34 as a function of temperature for AMBER ff03w, ff03ws, and ff03w-sc with two different scaling factors, 1.10 and 1.15. The red dashed line indicates the experimental value at 300 K. **B, C.** Backbone RMSD for ubiquitin and villin HP35 simulated with ff03w-sc with the scaling factor of 1.15. The red dashed line indicates an RMSD of 0.3 nm, serving as a reference threshold for stability. D. Radius of gyration of CspM34 as a function of temperature for AMBER ff99SBws and its side-chain scaling variant for all residues (except glycine).


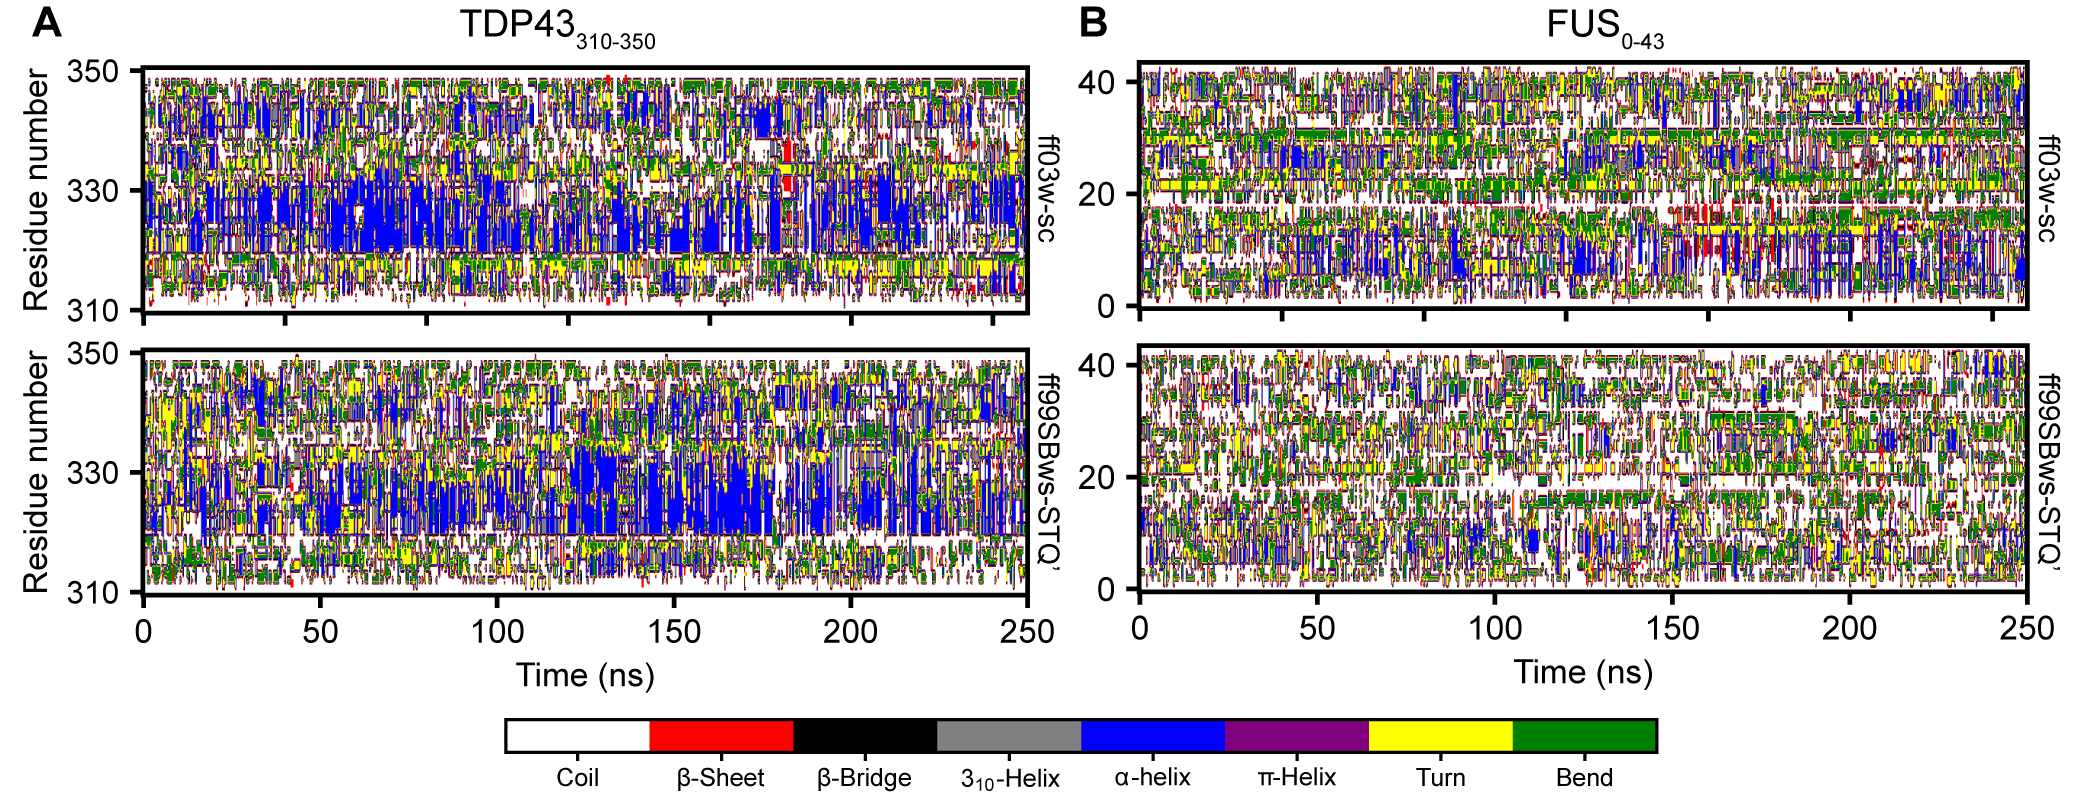


**Figure S5.** Secondary structure variation (DSSP) as a function of time for (**A**) TDP43310-350 and (**B**) FUS0-43 simulated in AMBER ff03w-sc and ff99SBws-STQ′ at the temperature of 302 K.


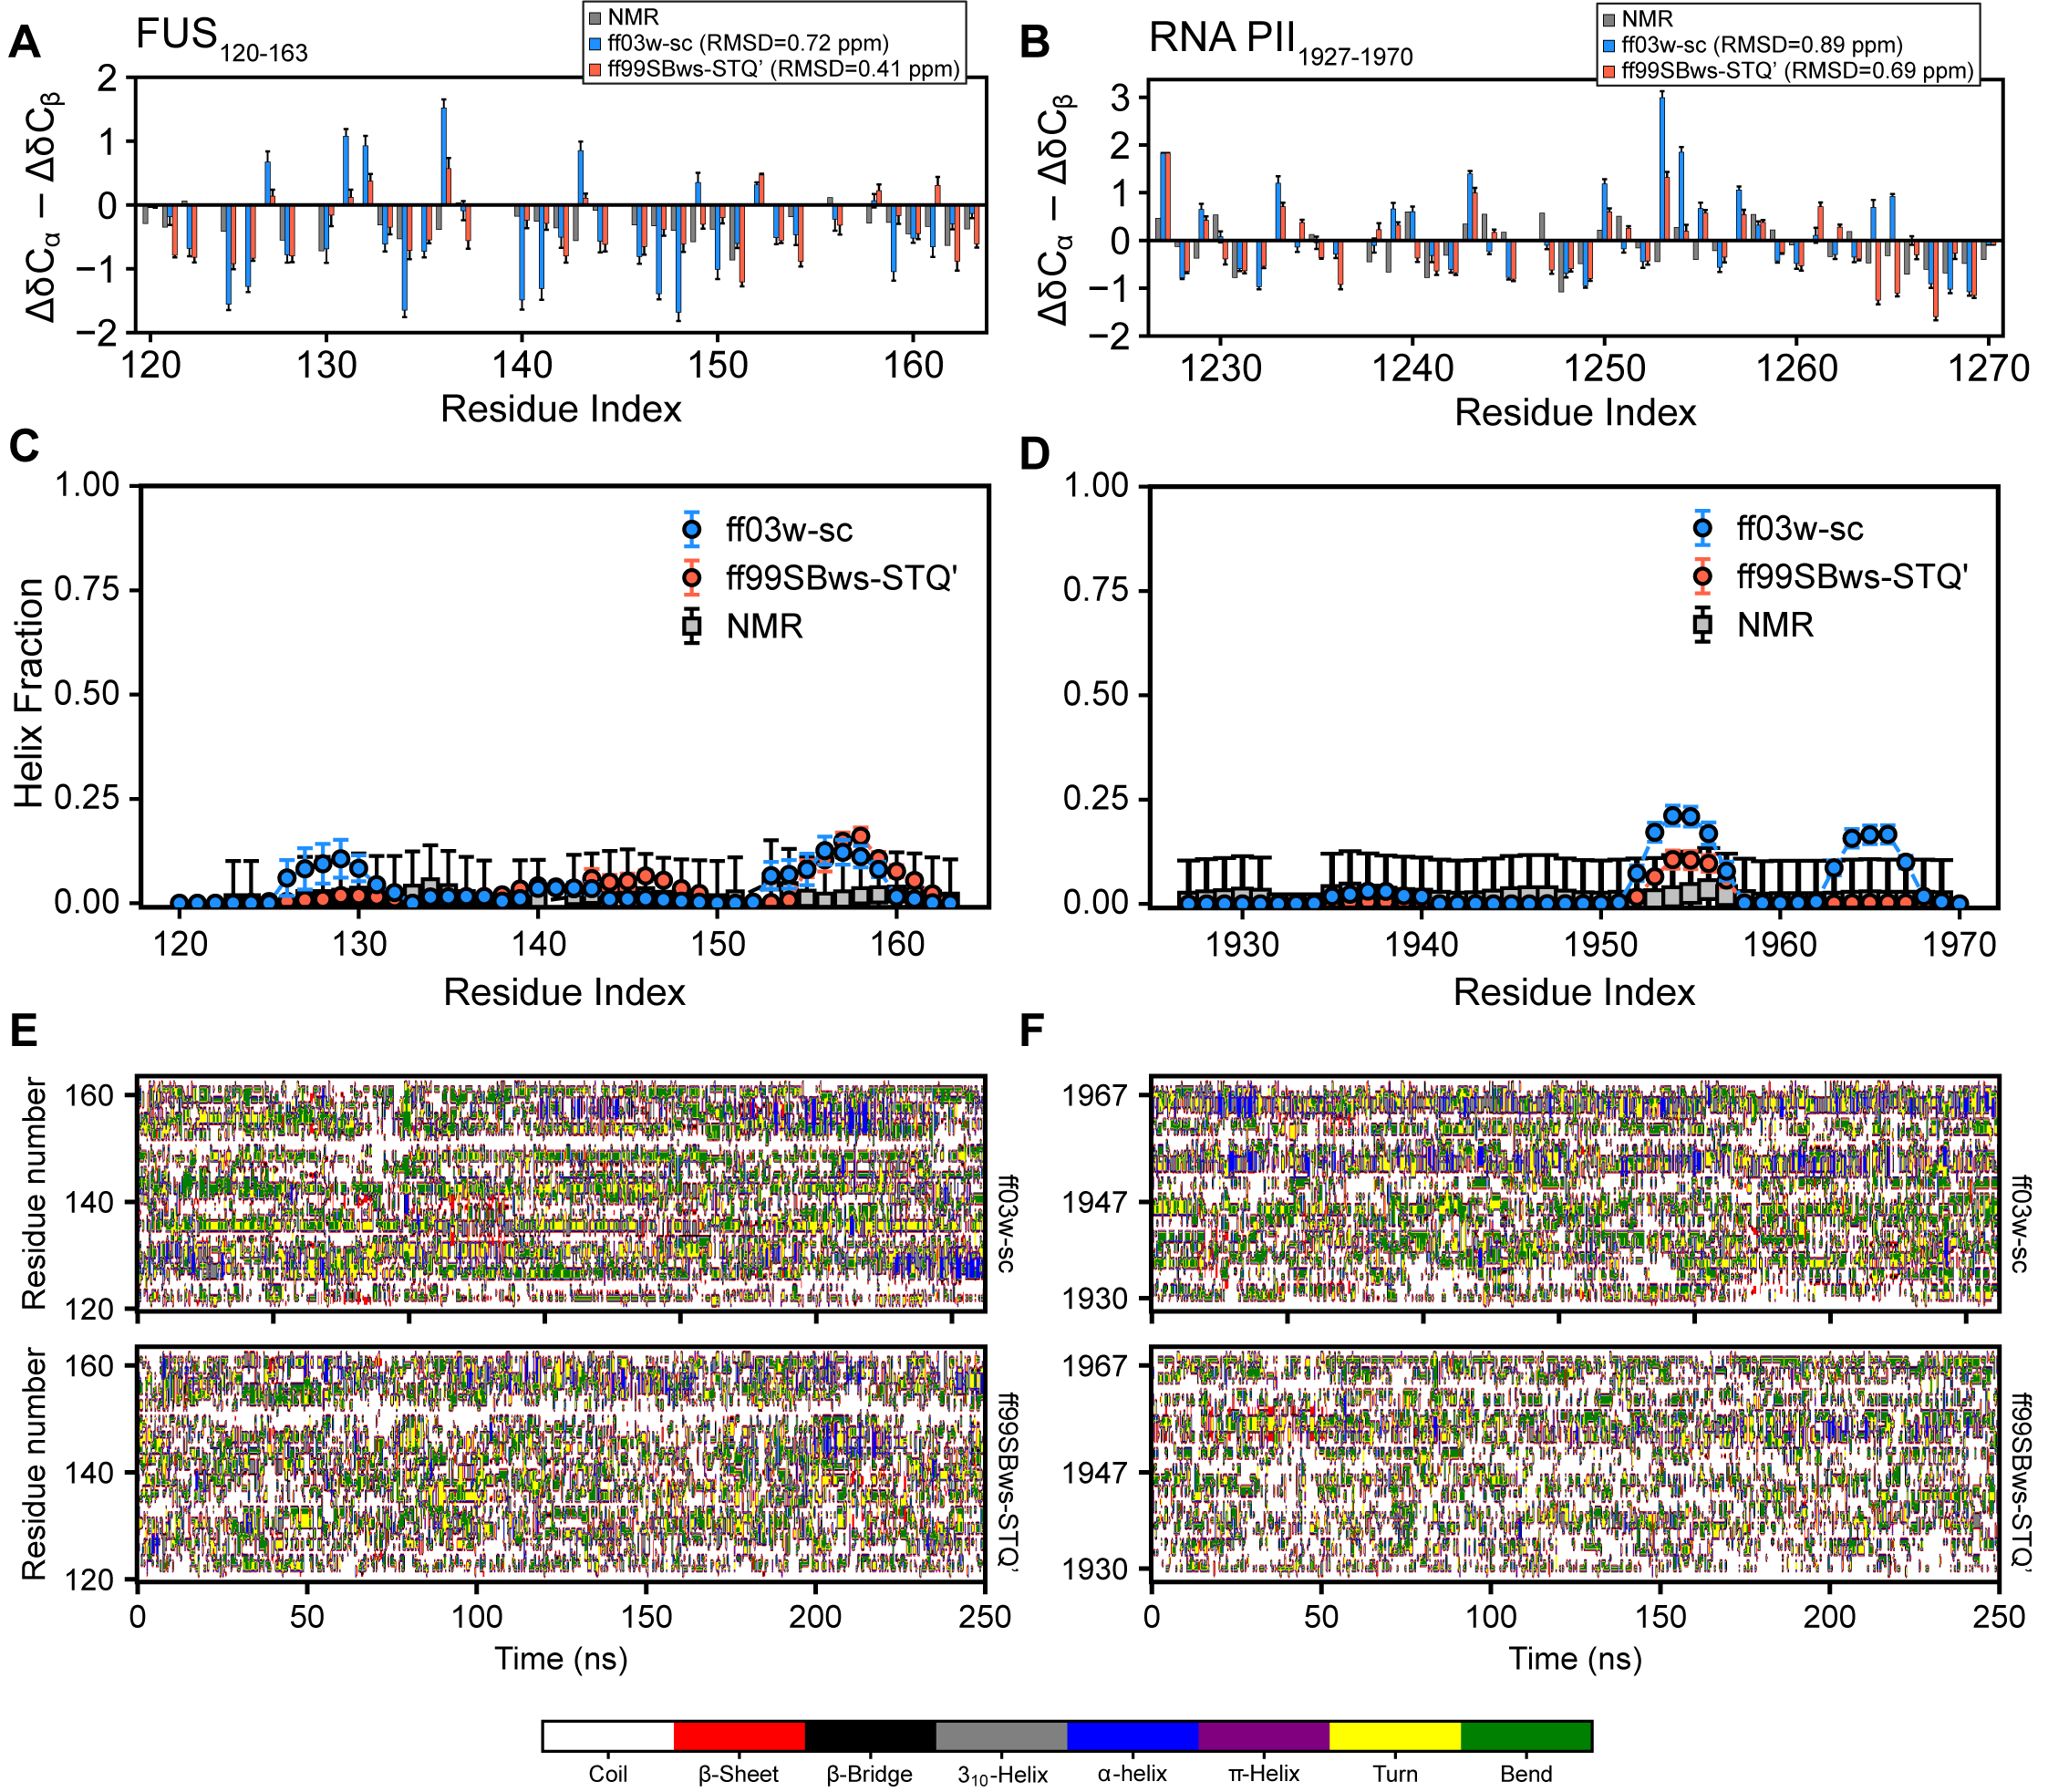


**Figure S6.** Chemical shift deviations (Δ𝛿Cα − Δ𝛿Cβ) (**A, B**), residual helix fraction (C**, D**), and secondary structure variation (**E, F**) for FUS120-163 and RNA PII1927-1970 simulated with ff03w-sc and ff99SBws-STQ′ at the temperature of 302 K.


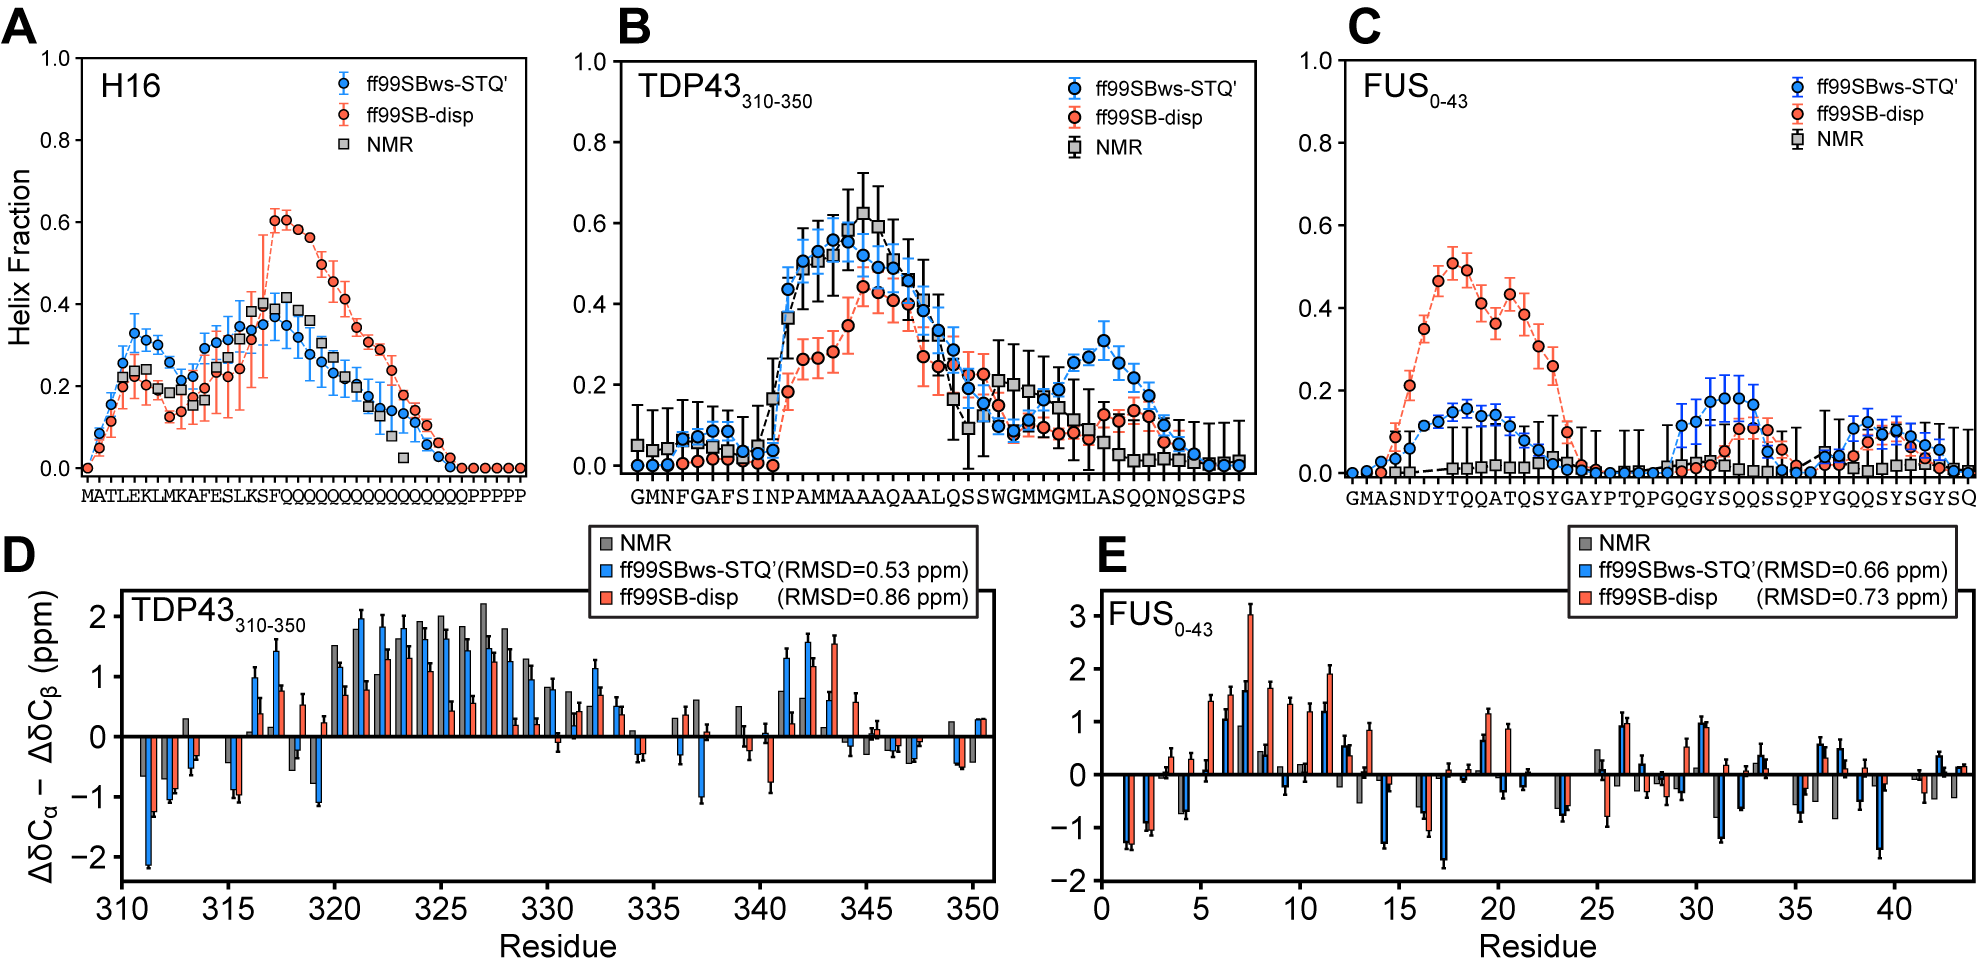


**Figure S7**. **A-C**. Residual helix fraction of Httex1-Q16 (A), TDP43310-350 (B), and FUS0-43 (C), simulated in three Amber ff99SBws-STQ′ and ff99SB-disp. NMR-derived results were taken from Urbanek et al. for H16,1,2 for TDP43310-350, and ref. for FUS0-43. Error bars for the NMR-derived 𝛿2D population per residue for TDP43310-350 and FUS0-43 are 0.1 (10%). Residual helix fraction of Httex1-Q16 from the simulation using AMBER ff99SB-disp was taken from Mohanty et al.3 while the results for TDP43310-350 and FUS0-43 using AMBER ff99SBws-STQ′ was calculated from 302 K replica of PT-WTE simulations. **D-E**. Chemical shift deviations (Δ𝛿Cα − Δ𝛿Cβ) for TDP43310-350 (D) and FUS0-43 (E) calculated from 302 K replica of PT-WTE simulations using AMBER ff99SBws-STQ′ and ff99SB-disp compared to the experimental results.


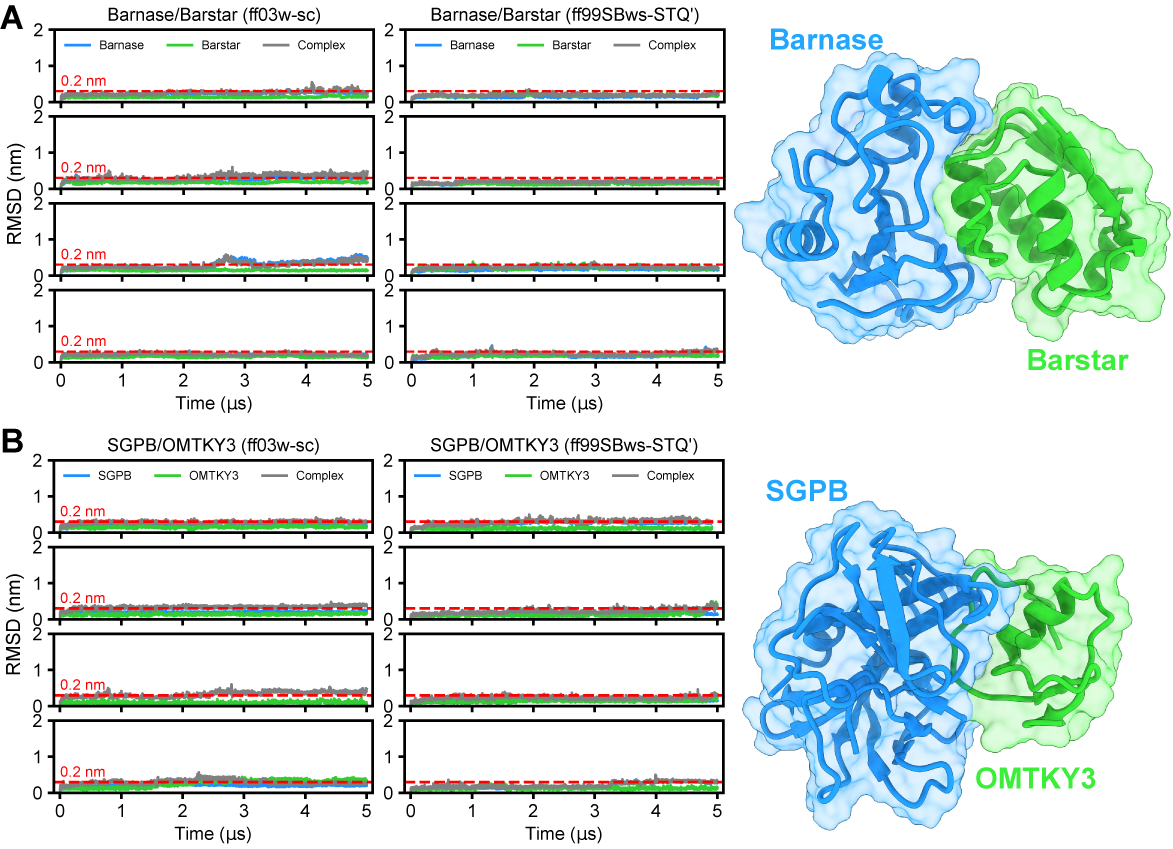


**Figure S8.** **Protein complexes stability**. Backbone-based RMSD as a function of time of two protein complexes Barnase/Barstar and SGPB/OMTKY3 for four independent simulations using ff03w-sc and ff99SBws-STQ′ force fields. The RMSD of each protein monomer is shown in blue and green and the RMSD for the complex is shown in gray. The red dashed line indicates an RMSD of 0.2 nm, serving as a reference threshold for stability.


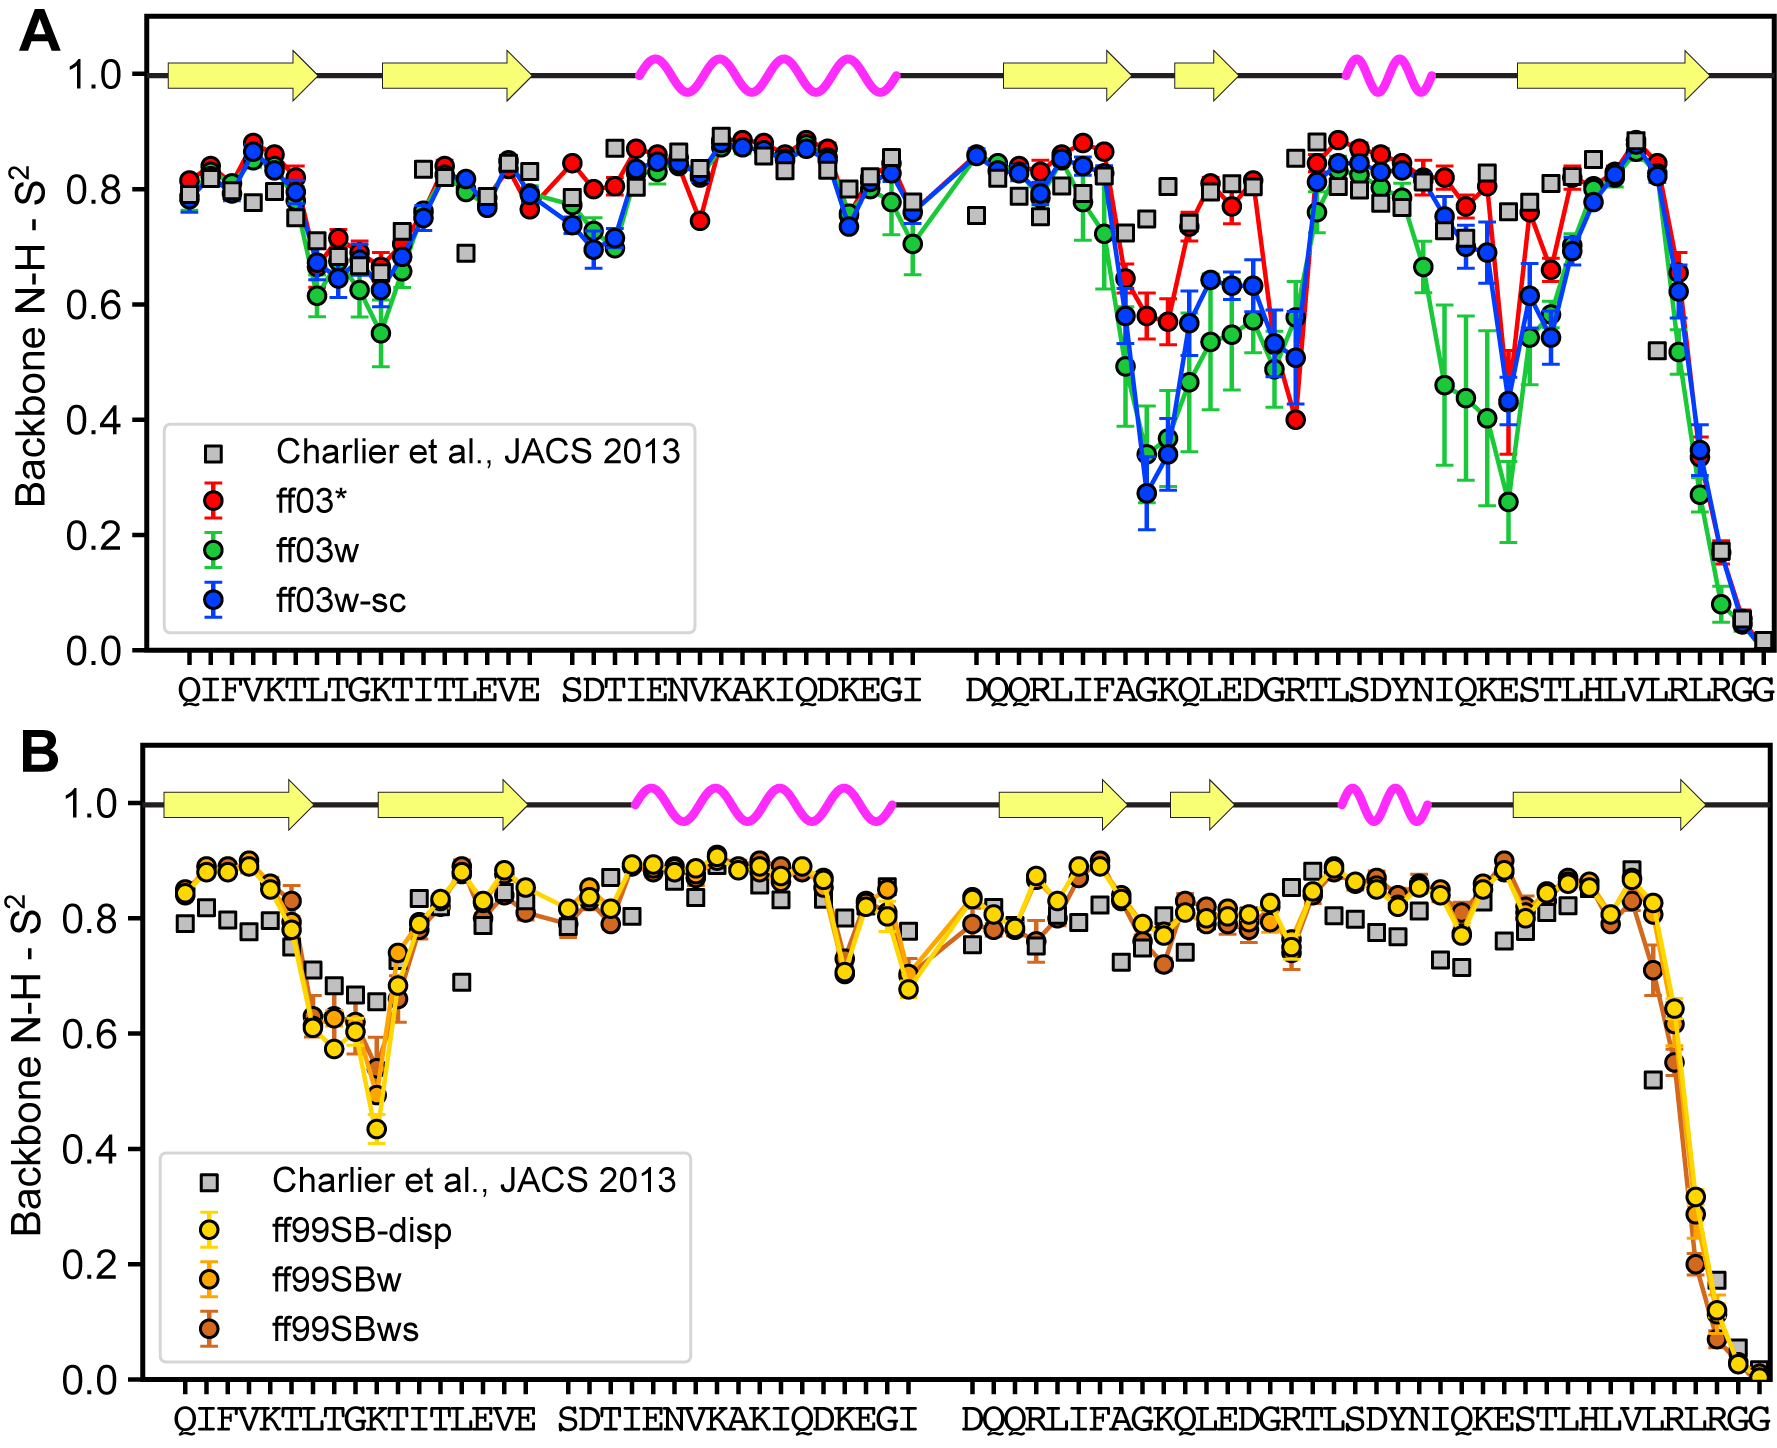


**Figure S9.** NMR order parameters for Ubiquitin simulated with (**A**) amber ff03-based and (**B**) amber ff99SB-based force fields. Square symbols are experimental data taken from Charlier et al.4


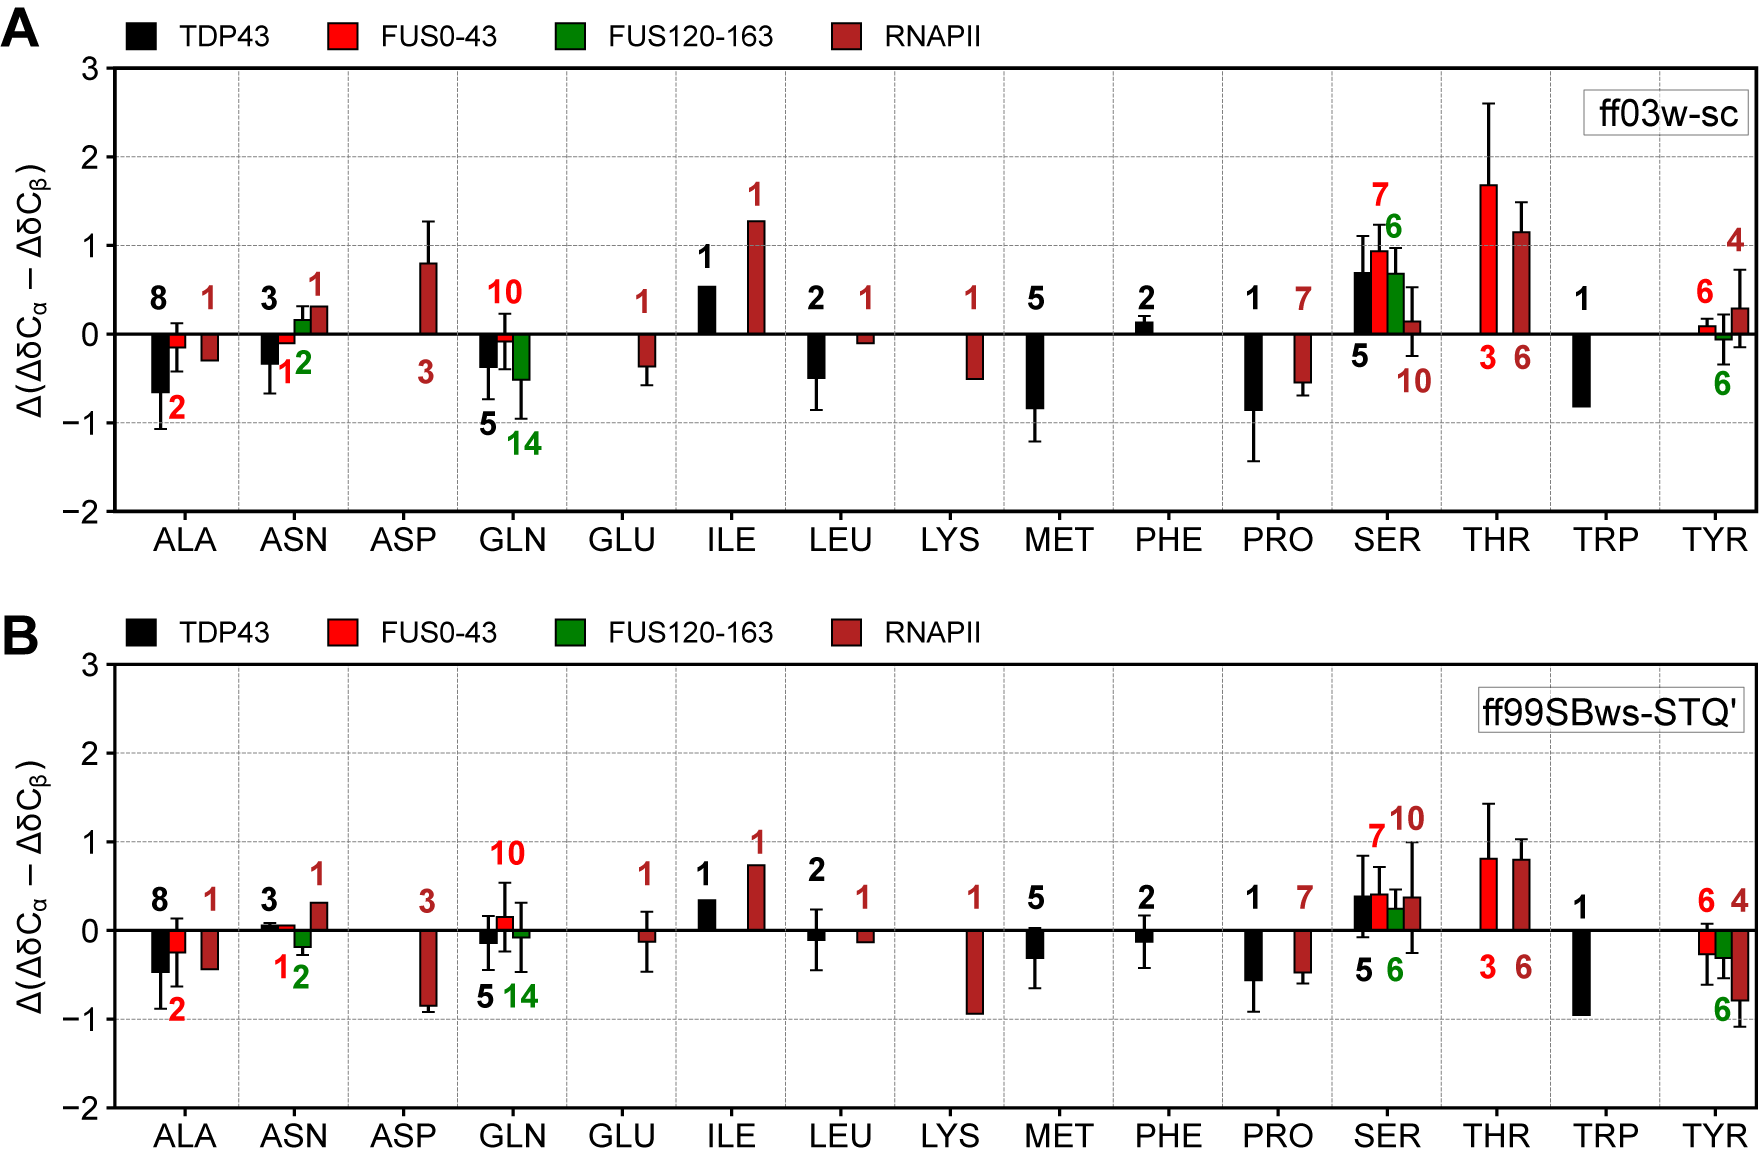


**Figure S10**: Chemical shift deviations, Δ(Δ𝛿Cα − Δ𝛿Cβ) in ppm, from NMR 13C chemical shifts in simulations of low complexity fragments using ff03w-sc (**A**) and ff99SBws-STQ′ (**B**) force fields. Error bars represent the standard deviations across the sampled residues. Annotated numbers next to the bars indicate the number of residues of each type present in the chosen fragment.


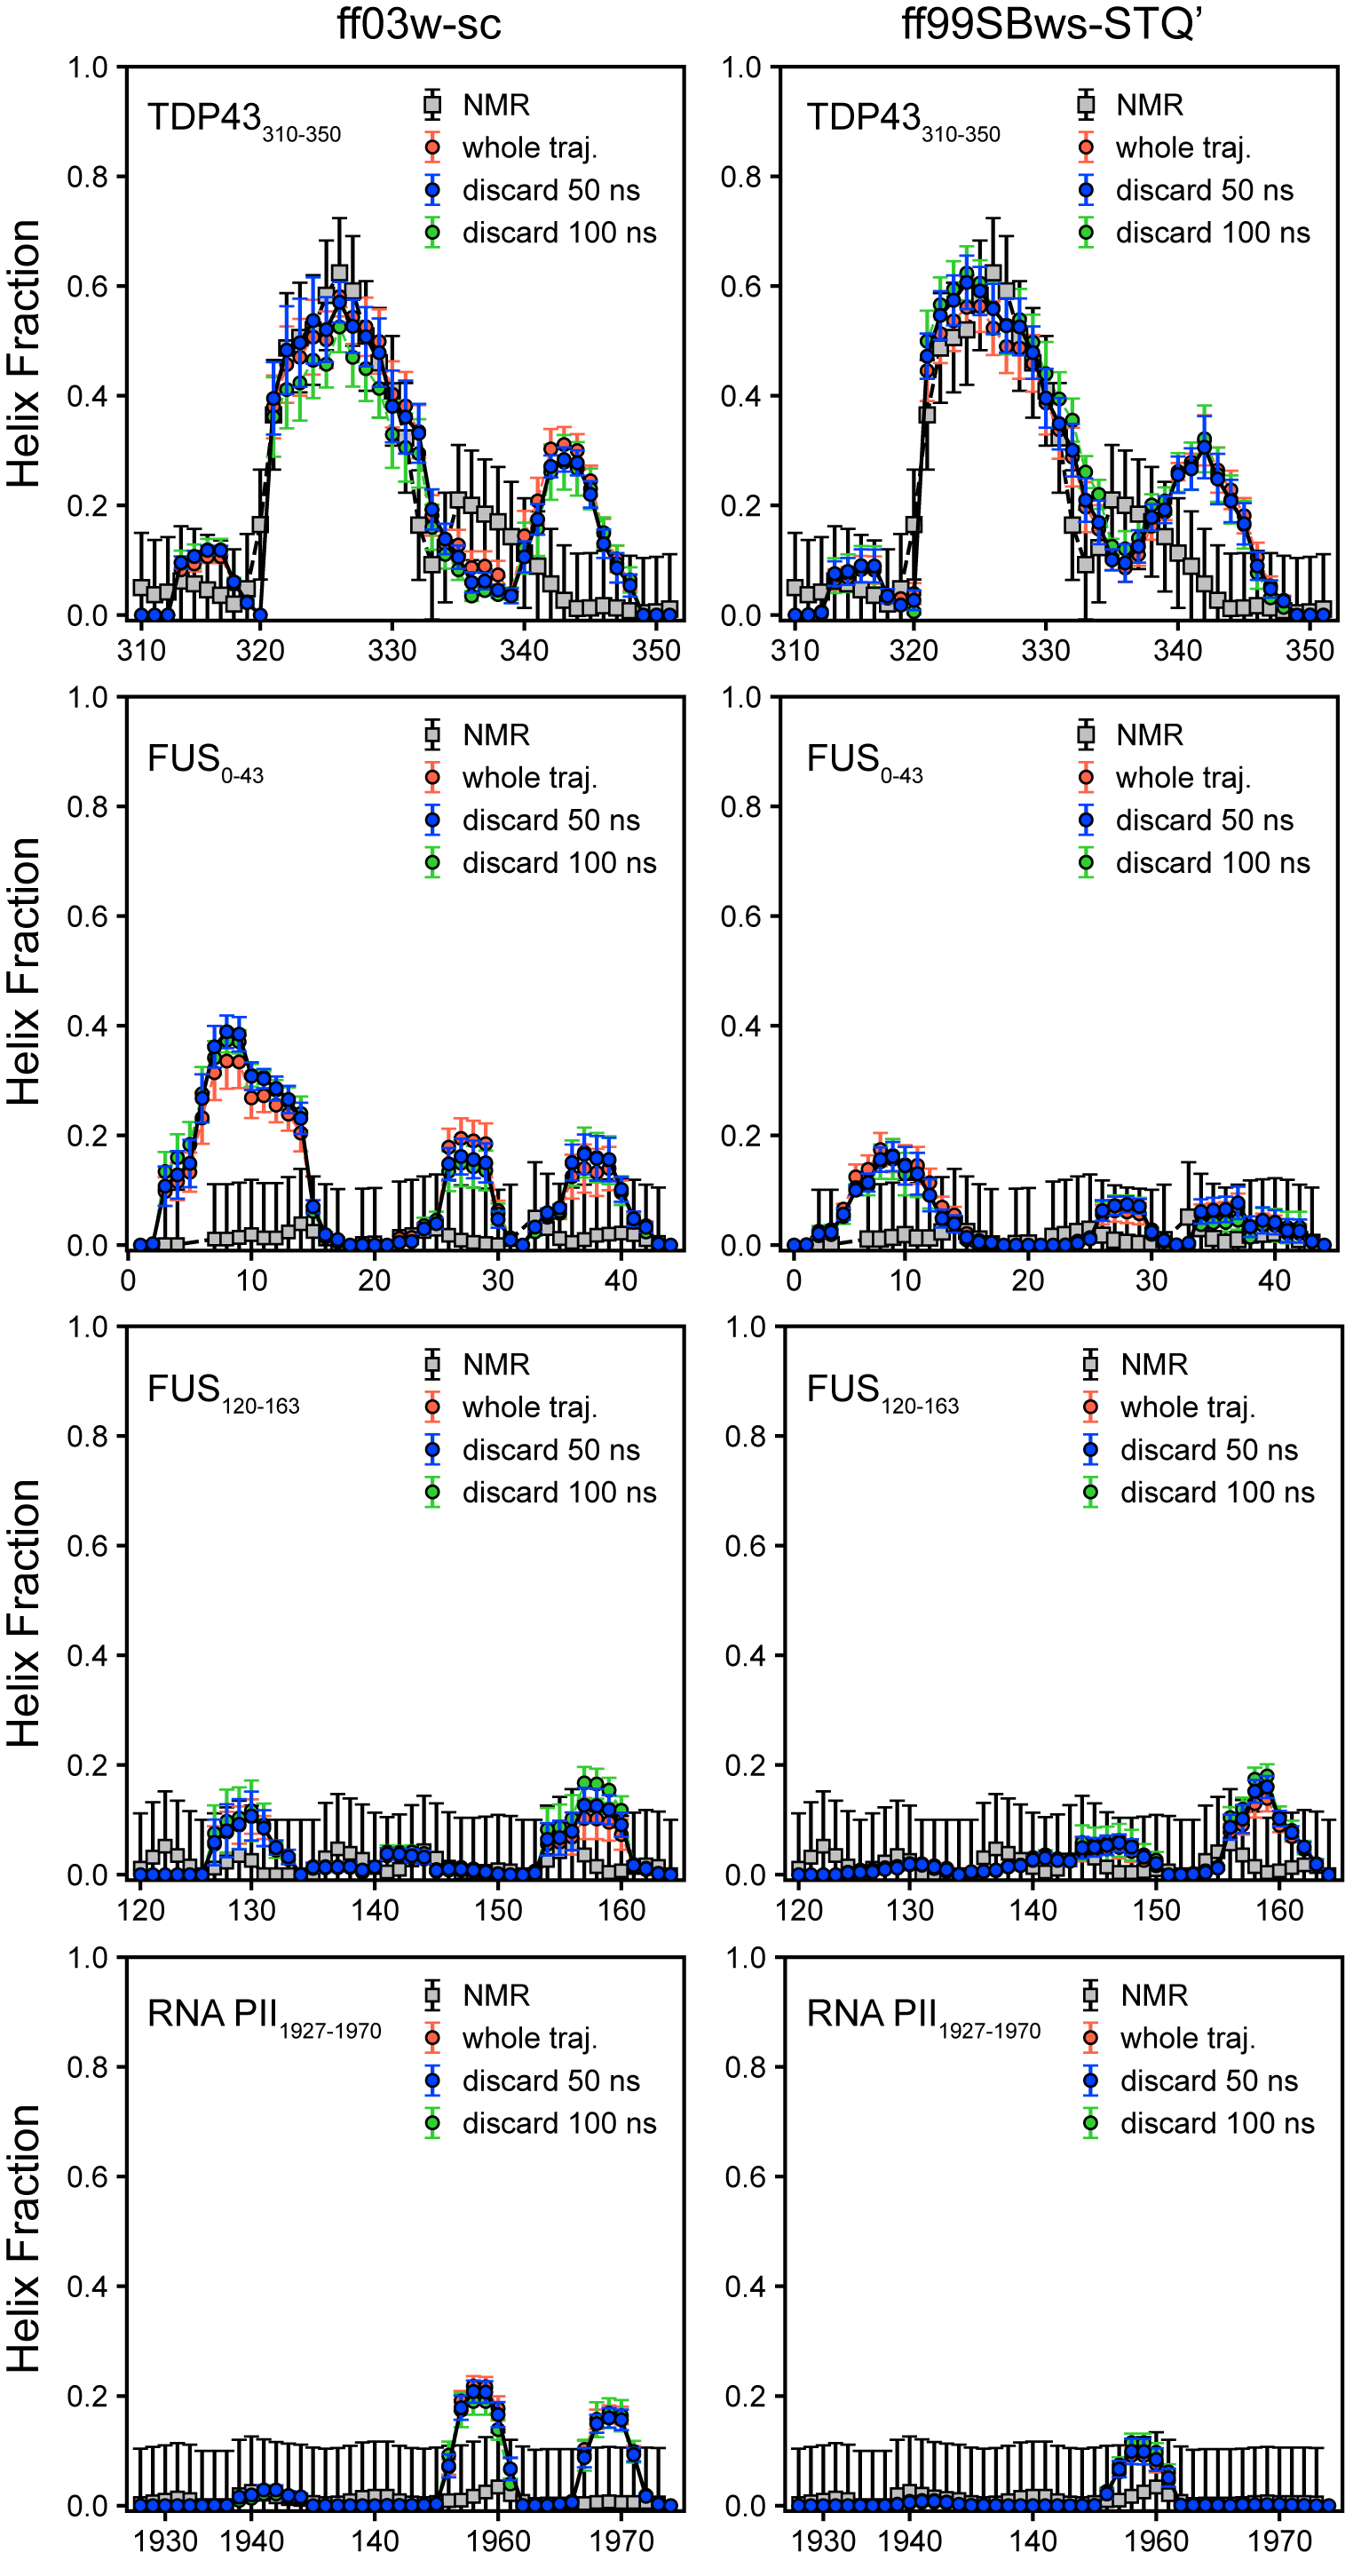


**Figure S11**. Residual helix fraction of TDP43310-350, FUS0-43, FUS120-163, and RNA PII1927-1970 analyzed on the entire trajectory, and after removing the first 50 and 100 ns. Error bars for helix fraction indicate the standard deviations between 50 ns periods in simulation trajectories. Error bars for NMR-derived 𝛿2D population per residue are 0.1 (10%).
